# Supplementary material for: Composite Nanocellulose Fibers-Based Hydrogels Loading Clindamycin HCl with Ca2+ and Citric Acid as Crosslinking Agents for Pharmaceutical Applications
Source: MDPI journal article supplement (doi:10.3390/polym13244423), 2021-12-16
Supplement: s1 [file s1]

# Supplementary Materials: Composite Nanocellulose Fiber-Based Hydrogels Loading Clindamycin HCl with $\text{Ca}^{2+}$ and Citric Acid as Crosslinking Agents for Pharmaceutical Applications

Pichapar O-chongpian <sup>1</sup>, Mingkwan Na Takuathung <sup>2</sup>, Chuda Chittasupho <sup>1,3</sup>, Warintorn Ruksiriwanich <sup>1,3</sup>, Tanpong Chaiwarit <sup>1</sup>, Phornsawat Baipaywad <sup>4</sup> and Pensak Jantrawut <sup>1,3,\*</sup>

<sup>1</sup> Department of Pharmaceutical Sciences, Faculty of Pharmacy, Chiang Mai University, Chiang Mai 50200, Thailand; pichaparo@gmail.com (P.O.-c.); chuda.c@cmu.ac.th (C.C.); yammy109@gmail.com (W.R.); tanpong.c@gmail.com (T.C.)

<sup>2</sup> Department of Pharmacology, Faculty of Medicine, Chiang Mai University, Chiang Mai 50200, Thailand; mingkwan.n@cmu.ac.th

<sup>3</sup> Cluster of Research and Development of Pharmaceutical and Natural Products Innovation for Human or Animal, Chiang Mai University, Chiang Mai 50200, Thailand

<sup>4</sup> Biomedical Engineering Institute, Chiang Mai University, Chiang Mai 50200, Thailand; phornsawat.b@cmu.ac.th

\* Correspondence: pensak.amuamu@gmail.com or pensak.j@cmu.ac.th; Tel.: +66-53944309

**Citation:** O-chongpian, P.; Na Takuathung, M.; Chittasupho, C.; Ruksiriwanich, W.; Chaiwarit, T.; Baipaywad, P.; Jantrawut, P. Composite Nanocellulose Fibers-Based Hydrogels Loading Clindamycin HCl with  $\text{Ca}^{2+}$  and Citric Acid as Crosslinking Agents for Pharmaceutical Applications. *Polymers* **2021**, *13*, 4423. <https://doi.org/10.3390/polym13244423>

Academic Editor: Luis García-Fernández

Received: 15 November 2021

Accepted: 14 December 2021

Published: 16 December 2021

**Publisher's Note:** MDPI stays neutral with regard to jurisdictional claims in published maps and institutional affiliations.

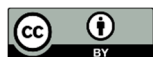

**Copyright:** © 2021 by the authors. Licensee MDPI, Basel, Switzerland. This article is an open access article distributed under the terms and conditions of the Creative Commons Attribution (CC BY) license (<https://creativecommons.org/licenses/by/4.0/>).

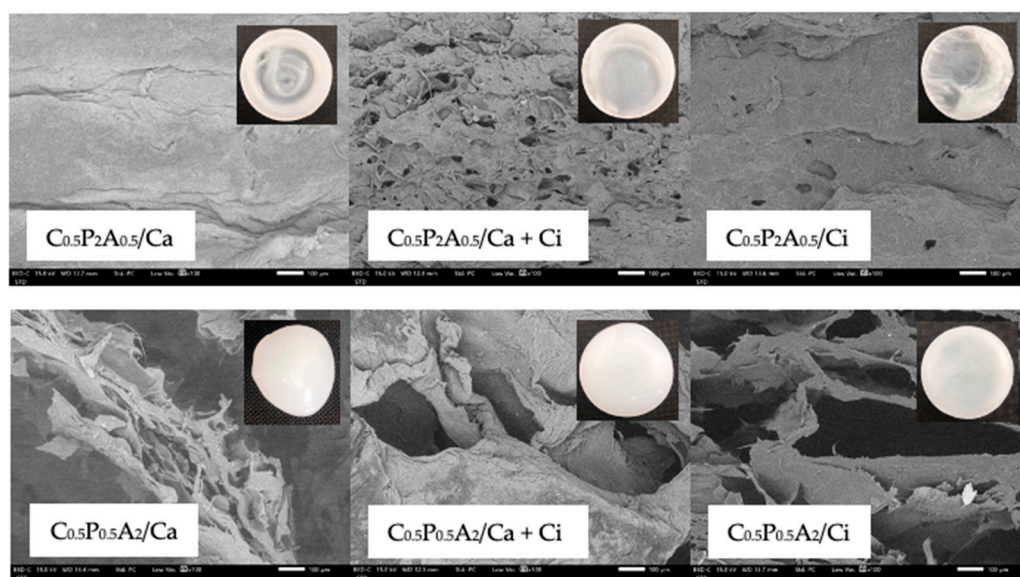

**Figure S1.** Gross appearance and SEM images of cross-section at 100× of CNFs-based hydrogels that composed of C:P:A with mass ratio 0.5:2:0.5 and 0.5:0.5:2.

**Table S1.** Thickness of CNFs-based hydrogels that composed of C:P:A with mass ratio 0.5:2:0.5 and 0.5:0.5:2 formulations.

| Formulations                                            | Thickness (mm) | Puncture strength (N/mm <sup>2</sup> ) | Young's modulus (N/mm <sup>2</sup> ) |
|---------------------------------------------------------|----------------|----------------------------------------|--------------------------------------|
| C <sub>0.5</sub> P <sub>2</sub> A <sub>0.5</sub> /Ca    | 3.990 ± 2.199  | NA                                     | NA                                   |
| C <sub>0.5</sub> P <sub>2</sub> A <sub>0.5</sub> /Ca+Ci | 3.742 ± 2.151  | NA                                     | NA                                   |
| C <sub>0.5</sub> P <sub>2</sub> A <sub>0.5</sub> /Ci    | 3.541 ± 2.146  | NA                                     | NA                                   |
| C <sub>0.5</sub> P <sub>0.5</sub> A <sub>2</sub> /Ca    | 11.740 ± 5.453 | NA                                     | NA                                   |
| C <sub>0.5</sub> P <sub>0.5</sub> A <sub>2</sub> /Ca+Ci | 5.558 ± 2.453  | NA                                     | NA                                   |
| C <sub>0.5</sub> P <sub>0.5</sub> A <sub>2</sub> /Ci    | 3.916 ± 2.674  | NA                                     | NA                                   |

NA (Not applicable): A large standard deviation of the thickness of CNFs-based hydrogels that composed of C:P:A with mass ratio 0.5:2:0.5 and 0.5:0.5:2 indicates that these formulations were not suitable for mechanical testing.
